# Supplementary material for: The Impact of a Dissonance-Based Eating Disorders Intervention on Implicit Attitudes to Thinness in Women of Diverse Sexual Orientations
Source: Front Psychol. 2019 Nov 29;10:2611. doi: 10.3389/fpsyg.2019.02611 (PMC6895132; doi:10.3389/fpsyg.2019.02611)
Supplement: DATA SHEET S1 — Final data set. [file Data_Sheet_1.CSV]

CIS	Eligible	complete_EAT	complete_IAT	Group	Sexualorientation	Group_3cat	EAT26_time1	EAT26_time2	Age	IAT_D_Time1	IAT_D_Time2	Complete
tnvt39	1	1	0	0	3		13	11	18	-0.365566053		0
htxp76	1	1	0	0	4		2	4	20	1.447849784		0
a.mcevoy		0	0	0	1	0				0.138883183		0
140250923		0	0	0	1	0						0
b6045894		0	0	0	1	0				0.446800281		0
150609405		0	0	0	1	0						0
0898LT	0	0	0	0	1	0	53		18	0.711072356		0
3006RP	1	0	0	0	1	0	15		18	1.24241148		0
160722594		0	0	0	1	0						0
2303ZH	1	0	0	0	1	0	21		19	1.663672021		0
2003VB	1	0	0	0	1	0	1			1.295033524		0
2108MI	0	0	0	0	1	0	42		19	1.540011551		0
2208EO	1	0	1	0	1	0	7		21	1.864442563	1.036776285	0
dpkn48	1	1	0	0	1	0	8	0	19			0
jxqm47	1	1	0	0	1	0	2	2	19			0
2802BM	1	1	0	0	1	0	19	26	21	-0.148275116		0
2911HB	1	1	0	0	1	0	15	10	19	0.003627145		0
2911lc	0	1	0	0	1	0	48	27	19	0.747651388		0
0612GT	1	1	0	0	1	0	3	4	20	0.305440675		0
0505SH	1	1	0	0	1	0	0	19	18	1.591111692		0
0808VO	0	1	0	0	1	0	36	46	20	1.482993372		0
1005NR	0	1	0	0	1	0	35	33	19	1.119357066		0
0509KW	1	1	0	0	1	0	15	22	21	1.982518906		0
nxxk45	1	1	0	0	2	0	8	9	19	-1.250278136		0
mwtr81	1	1	0	0	2	0	3	0	21	0.92073236		0
EG		0	0	1	1	1				0.789236656		0
KF0102		0	0	1	1	1				-1.313043796		0
0714GW		0	0	1	1	1		4		0.871687136		0
1009CD		0	0	1	1	1		23		0.494316094		0
yellowroses	0	0	0	1	1	1	35		21	-1.555885952		0
2406KW	1	0	0	1	1	1	13		21	1.355995683		0
1501AR	1	0	0	1	1	1	4		19	1.192850756		0
0911JR	1	0	0	1	1	1	3		21	1.966725519		0
em0408		0	0	1	1	1				1.323289797		0
1312LS	1	0	1	1	1	1	23		20	1.968729671	1.798681284	0
170996HH	1	0	1	1	1	1	16		20	1.550624601	1.720711978	0
xnsh28	1	1	0	1	1	1	11	10	20			0
1610KM	1	1	0	1	1	1	21	11	21	-1.723416337		0
0908AB	1	1	0	1	1	1	6	3	19	1.330337067		0
1710JW	1	1	0	1	1	1	10	4		0.323947885		0
0402MJ	1	1	0	1	1	1	14	9.5		0.820988607		0
hmxm23	1	1	0	1	1	1	15	17	22	0.919062435		0
0408EM	1	1	0	1	1	1	7	5	18	0.988434444		0
fdxr14	1	1	0	1	1	1	10	3	21	1.204216462		0
1810KS	1	1	0	1	1	1	7	5.5	20	1.775065019		0
wfgc87	1	1	0	1	1	1	5	8	19	1.322939981		0
snqv71	1	1	0	1	1	1	10	7	19	1.728442364		0
mggt38	1	1	0	1	1	1	1	1	21	1.975227465		0
cnvz68	1	1	0	1	1	1	13	5	19		1.780321106	0
kqtd69	1	1	0	1	5	2	2	0	25			0
tbfl65	1	1	0	1	7	2	4	1	19			0
qqdd85	1	1	1	0	3		12	15	20	1.778064778	-0.008312142	1
ssct44	1	1	1	0	3		5	7	23	1.933305532	1.892822176	1
dpkj38	1	1	1	0	4		2	3	18	-1.065348793	1.776825726	1
wstd74	1	1	1	0	5		3	2	18	1.849849897	1.656547691	1
jtgn42	1	1	1	0	1	0	4	18	20	1.336437306	-0.681621091	1
jlrk51	1	1	1	0	1	0	9	13	18	0.23823085	-0.967441264	1
bwkn75	1	1	1	0	1	0	7	6	20	0.306578712	-0.167342897	1
zqht22	1	1	1	0	1	0	18	22	19	-0.081159719	0.032166575	1
fkhc58	1	1	1	0	1	0	4	5	18	0.473928051	1.777517439	1
qvjq53	1	1	1	0	1	0	3	6	19	-0.112366624	1.369759829	1
gqdn99	1	1	1	0	1	0	2	6	20	1.942134421	1.106581827	1
bxwn51	1	1	1	0	1	0	3	2	19	0.548632693		1
gbgk66	1	1	1	0	1	0	8	4	18	0.805277988	1.820793552	1
ltck23	1	1	1	0	1	0	17	11	18	1.44137819	1.598889162	1
hfkq88	1	1	1	0	1	0	11	12	18	1.746423465	1.913077967	1
gfmw21	1	1	1	0	1	0	23	11	19	1.816089761	1.712217691	1
jcgw69	1	1	1	0	1	0	21	20	22	1.681376988	1.437165854	1
cmpq95	1	1	1	0	1	0	9	9	19	1.745116614	1.93272797	1
cmmt12	1	1	1	0	1	0	20	10	20	1.094582625	1.862485899	1
kvss56	1	1	1	0	1	0	4	2	19	0.847514593	1.60675119	1
wttx29	1	1	1	0	2	0	6	3	20	0.49925398	0.022472622	1
mhbf61	1	1	1	0	2	0	8	17	18	1.966193888	0.783118424	1
qgtt33	1	1	1	0	2	0	1	8	20	-0.47284719	0.879668433	1
vnbb95	1	1	1	0	2	0	25	25	20	-1.042928576	1.69462192	1
mggx98	1	1	1	0	2	0	5	4	18	1.410545657	1.79459939	1
zqcx44	1	1	1	0	2	0	16	22	20	1.023111364		1
qgrm15	1	1	1	1	1	1	10	2	19	0.212128188	-0.07817758	1
wlsx74	1	1	1	1	1	1	2	3		1.591803193	-1.328401028	1
0102KF	0	1	1	1	1	1	27	15	20	-0.838186581	-0.988215923	1
1208AE	0	1	1	1	1	1	50	10	19	-0.44553286	-0.673649617	1
0710OM	1	1	1	1	1	1	16	3.5	19	1.974441919	-0.047718004	1
1407GW	1	1	1	1	1	1	18	14	18	1.982578563	0.012853363	1
pbgw57	1	1	1	1	1	1	15	6		0.768000845	0.13861829	1
hlvp59	1	1	1	1	1	1	7	3	19		0.083130991	1
czln37	1	1	1	1	1	1	22	28	19	1.216976789	0.367440145	1
2807LP	1	1	1	1	1	1	7	4		1.531423578	0.20002191	1
0308LH	1	1	1	1	1	1	7	5.5	18	1.412198737	0.600727653	1
hvjc95	1	1	1	1	1	1	8	6	19	1.303733998	0.675173764	1
1305EG	1	1	1	1	1	1	8	1.5	19	1.927699532		1
xwpw73	1	1	1	1	1	1	4	7	19	1.453098862	1.23790548	1
pbrd45	1	1	1	1	1	1	13	1	19	1.032416515	0.907755511	1
1404AF	0	1	1	1	1	1	26	22	19	1.884405443	1.745169474	1
gjql57	1	1	1	1	1	1	10	0	19	0.584538826	0.315875979	1
1610SC	0	1	1	1	1	1	35	20	21	1.962638966	1.915654691	1
bdvc65	1	1	1	1	1	1	5	7	19	0.690378081	1.536107716	1
1809HK	1	1	1	1	1	1	10	5.5	18	1.439588191	1.674337616	1
1404sw	1	1	1	1	1	1	0	1.5	18	0.630127208	1.305509391	1
2202MM	0	1	1	1	1	1	26	1	20	1.708868323	1.434037202	1
0804HM	1	1	1	1	1	1	24	11.5	18	1.817766213	1.776006547	1
2103GO	1	1	1	1	1	1	4	3	18	1.889267569	1.367922092	1
1208EM	0	1	1	1	1	1	34	11.5	20	1.973585027	1.546450564	1
ptkv78	1	1	1	1	1	1	19	3	20	0.930696675	0.35645834	1
2410CYM	0	1	1	1	1	1	51	56	20	0.711783632	1.088262093	1
ggvp46	1	1	1	1	1	1	7	5	18	1.913197013	1.71153536	1
2908HN	1	1	1	1	1	1	25	37.5	20	1.820666364	1.943331902	1
2206CW	1	1	1	1	1	1	15	0	18	1.414951378	1.872190209	1
ghlf43	1	1	1	1	2	1	11	8	20	1.700973718	-1.566511382	1
fbxw36	1	1	1	1	2	1	8	7	21	1.895549646	1.824144727	1
vkjj88	1	1	1	1	4	2	2	3	20	-0.460022377	-0.906909391	1
fzpf66	1	1	1	1	4	2	0	2	19	-1.720798631	-0.306672481	1
rxcp35	1	1	1	1	4	2	7	3	24	0.479525	0.898340519	1
trdm34	1	1	1	1	4	2	14	13	20	-1.6439114	1.398965849	1
qszw54	1	1	1	1	4	2	6	0	18	1.277823113	1.638324814	1
svvz87	1	1	1	1	4	2	18	8	20	0.817733386	1.44514078	1
mmdv35	1	1	1	1	5	2	11	5	20	-0.508990921	-0.375294376	1
zshv61	1	1	1	1	5	2	25	9	20	1.250442717	-0.495343774	1
clkk71	1	1	1	1	5	2	21	6	21	1.658592594	1.324752283	1
dmqn46	1	1	1	1	5	2	2	2	20	-0.122827417	1.303877063	1
wwdf48	1	1	1	1	5	2	14	4	20	-0.461347014	1.97185305	1
sdph34	1	1	1	1	6	2	9	6	19	0.66736357	-1.434976147	1
fhgn85	1	1	1	1	6	2	7	5	20	-0.336469019	1.837815244	1
vwhp58	1	1	1	1	6	2	24	5	30	-0.422469846	1.491418437	1
bkfl57	1	1	1	1	7	2	5	2	20	-1.26115486	-0.077621966	1
vvmt32	1	1	1	1	7	2	5	8	19	-0.141118453	1.424242932	1
